# Supplementary material
Source: publisher site journal article supplement (https://www.dovepress.com/article/172222)
Supplement: Supplementary file 1 [file get_supplementary_file.php]

**Supplemental Table 1** Statements in the *General Aspects* area

| Statement                                                                                                                                                                                                   | Outcomes |         |         |
|-------------------------------------------------------------------------------------------------------------------------------------------------------------------------------------------------------------|----------|---------|---------|
|                                                                                                                                                                                                             | Round 1  | Round 2 | Ranking |
| <b>General consideration</b>                                                                                                                                                                                |          |         |         |
| The mortality of patients with cystic fibrosis is influenced by the level of adherence to the therapeutic prescriptions received                                                                            | D        | D       | —       |
| The morbidity of patients with cystic fibrosis is influenced by the level of adherence to the therapeutic prescriptions received                                                                            | D        | D       | —       |
| Initiatives aimed at assessing the adherence of patients to treatment are limited by the difficulty in measuring adherence                                                                                  | D        | D       | —       |
| Initiatives aimed at supporting the adherence of patients to treatment are limited by the difficulty in measuring adherence                                                                                 | D        | D       | —       |
| <b>Definition</b>                                                                                                                                                                                           |          |         |         |
| Adherence is following the right treatment at the right dosages (drugs/activities) and with the expected course of treatment                                                                                | NC       | —       | —       |
| Adherence is an individual behavior comprising the degree of concordance with the medical advice received and the persistence of the behavior itself (ie, continued treatment for the recommended duration) | H        | —       | 3       |
| Adherence means agreeing to one's own treatment plan and committing to follow it                                                                                                                            | H        | —       | 1       |
| Often the patient does not adhere to treatment involuntarily                                                                                                                                                | NC       | —       | —       |
| Often the patient is not adhering because he doesn't want to follow the instructions received                                                                                                               | NC       | —       | —       |
| <b>Influencing factors</b>                                                                                                                                                                                  |          |         |         |
| Adherence is influenced by the difficulty in combining the patient's lifestyle and obligations imposed by therapies                                                                                         | H        | —       | 2       |
| Adherence is influenced by the high burden of treatment                                                                                                                                                     | H        | —       | 4       |
| The adherence to treatment is influenced by the fact that the patient cannot accept feeling different from others                                                                                           | NC       | —       | —       |
| Adherence to treatment is influenced by the subjective belief that drugs are not effective or are potentially toxic                                                                                         | NC       | —       | —       |
| Adherence to treatment is influenced by the patient's clinical status                                                                                                                                       | NC       | —       | —       |
| Adherence to treatment is influenced by cultural factors (patient/ family education)                                                                                                                        | NC       | —       | —       |
| Adherence to treatment is influenced by social factors                                                                                                                                                      | D        | D       | —       |
| Adherence to treatment is influenced by the attitude of the family (hyper or hypo involvement)                                                                                                              | D        | D       | —       |

| Statement                                                                                                  | Outcomes |         |         |
|------------------------------------------------------------------------------------------------------------|----------|---------|---------|
|                                                                                                            | Round 1  | Round 2 | Ranking |
| Adherence to treatment is influenced by the attitude of the family (logistics/organizational difficulties) | D        | D       | —       |
| Adherence to treatment is influenced by the attitude of friends                                            | NC       | —       | —       |
| Adherence to treatment is influenced by embarrassment                                                      | NC       | —       | —       |
| Adherence is influenced by the attitude of the physician                                                   | NC       | —       | —       |
| Adherence is influenced by the attitude of the treating team                                               | D        | NC      | —       |
| Adherence is influenced by the physician's ability to communicate                                          | H        | —       | 7       |
| Adherence is influenced by the treating team's communication skills                                        | H        | —       | 6       |
| <b>Individual characteristics</b>                                                                          |          |         |         |
| Adherence is influenced by the age of the patient                                                          | NC       | —       | —       |
| Adherence is especially a problem for the adolescent patient                                               | D        | N       | —       |
| Adherence is a problem especially in adolescence (for physician and treating team)                         | D        | D       | —       |
| Adherence is a problem especially for the young adult patient                                              | NC       | —       | —       |
| Adherence is a problem experienced differently by gender                                                   | NC       | —       | —       |
| <b>Behavioral characteristics</b>                                                                          |          |         |         |
| Adherence is influenced by forgetting to follow treatment                                                  | NC       | —       | —       |
| Adherence is influenced by the tendency to deny the disease                                                | D        | NC      | —       |
| Adherence is influenced by the tendency to defer the care (incorrect perception of risks)                  | D        | D       | —       |
| Adherence is influenced by the tendency to defer care (insufficient knowledge of the pathology)            | NC       | —       | —       |
| Adherence is conditioned by the means of drug administration                                               | D        | NC      | —       |
| Adherence is influenced by the reluctance to take treatments in public                                     | D        | D       | —       |
| Adherence is influenced by the difficulty of entering treatments in daily lifestyle                        | D        | D       | —       |
| <b>Psychological characteristics</b>                                                                       |          |         |         |
| Adherence is conditioned by psycho-emotional conditions                                                    | H        | —       | 5       |
| Adherence is conditioned by doubt (about effectiveness of treatment)                                       | NC       | —       | —       |

Abbreviations: D = Disagreement; H = High level of agreement; NC = No consensus.

Rankings were assigned only to statements with a high level of agreement after Round 2 was completed.

**Supplemental Table 2** Statements in the *Roles and Relational Aspects* area

| Statement                                                                                                      | Outcomes |         |         |
|----------------------------------------------------------------------------------------------------------------|----------|---------|---------|
|                                                                                                                | Round 1  | Round 2 | Ranking |
| <b>Role of the healthcare team</b>                                                                             |          |         |         |
| Adherence is influenced by the size and organization of the facility of care                                   | NC       | —       | —       |
| Adherence is influenced more by the physician                                                                  | NC       | —       | —       |
| Adherence is influenced more by the single component than by the team                                          | NC       | —       | —       |
| Adherence is influenced more by the team than by the single component                                          | D        | D       | —       |
| Adherence is influenced by how therapeutic interventions that the patient must follow are organized            | D        | D       | —       |
| Adherence is influenced by the accuracy of information received by the patient from the physician              | D        | H       | 12      |
| Adherence is influenced by the accuracy of information received by the patient from the care team              | H        | —       | 5       |
| Adherence is influenced by the consistency of interventions dedicated to its support                           | H        | —       | 8       |
| Adherence is influenced by the understanding and sharing of interventions dedicated to its support             | H        | —       | 2       |
| Adherence is influenced by healthcare provider's ability to explain multiple aspects of the treatment          | H        | —       | 11      |
| To influence adherence, it is necessary to understand the reasons behind the obstacles experienced by patients | H        | —       | 6       |
| To influence adherence, it is necessary to build a relationship with the patient                               | H        | —       | 1       |
| Interventions on adherence require a change in the behavior of individuals                                     | D        | D       | —       |
| To take action on adherence requires a specific training path of the individual's physicians                   | D        | D       | —       |
| To take action on adherence requires a specific training path of the individual's treating team                | D        | D       | —       |
| <b>Patient resistance</b>                                                                                      |          |         |         |
| Adherence decreases when patients often decide to live a normal life regardless of the consequences            | D        | D       | —       |
| To improve adherence, is helpful to have an open and gradual approach to dialogue                              | H        | —       | 3       |

| Statement                                                                                               | Outcomes |         |         |
|---------------------------------------------------------------------------------------------------------|----------|---------|---------|
|                                                                                                         | Round 1  | Round 2 | Ranking |
| <b>Team/patient relationship</b>                                                                        |          |         |         |
| To improve adherence, a structured motivational approach is useful                                      | H        | —       | 7       |
| A directive approach with the patient (what to do) increases adherence                                  | NC       | —       | —       |
| A directive approach with the patient (what to do) reduces adherence                                    | NC       | —       | —       |
| Listening to the patient attitude (what does he do? why?) increases adherence                           | H        | —       | 4       |
| Listening to the patient attitude (what does he do? why?) reduces adherence                             | L        | —       | —       |
| The ability to influence adherence increases with understanding (what does he know? what does he want?) | D        | H       | 9       |
| The change in adherence behavior is a path made by the patient                                          | NC       | —       | —       |
| The change in adherence behavior is a path made by physicians and the treating team                     | NC       | —       | —       |
| A clear prescription of treatment is sufficient to induce the change                                    | D        | NC      | —       |
| The patient should be put in a situation where he can guide his own change                              | H        | —       | 10      |

Abbreviations: D = Disagreement; H = High level of agreement; L = Low level of agreement; NC = No consensus.

Rankings were assigned only to statements with a high level of agreement after Round 2 was completed.

**Supplemental Table 3** Statements in the *Management Aspects* area

| Statement                                                                                                                                 | Outcomes |         |         |
|-------------------------------------------------------------------------------------------------------------------------------------------|----------|---------|---------|
|                                                                                                                                           | Round 1  | Round 2 | Ranking |
| <b>Healthcare provider's cultural approach</b>                                                                                            |          |         |         |
| It is judged primarily on the quality of care than the quality of adherence                                                               | NC       | —       | —       |
| Priority is to negotiate the adherence related to the current patient's availability (negotiating priorities)                             | D        | D       | —       |
| Priority is to favor the patient's (and caregiver) involvement                                                                            | H        | —       | 1       |
| Priority is to pay attention to the patient and his needs                                                                                 | H        | —       | 3       |
| Priority is to take care of the development and cultural growth (oriented to adherence) of the treating team                              | D        | D       | —       |
| Priority is to take care of the development and cultural growth (oriented to adherence) of the physicians                                 | D        | D       | —       |
| <b>Patient-centeredness</b>                                                                                                               |          |         |         |
| Building and consolidating the strengths within the family influences adherence                                                           | H        | —       | 19      |
| Creating time to share positive information and appreciating the results obtained influence adherence                                     | H        | —       | 6       |
| Making perceptible the fact that the healthcare provider understands how the patient is living with his condition influences adherence    | H        | —       | 21      |
| Using negotiation and taking into account the patient's opinion influences adherence                                                      | H        | —       | 14      |
| Using negotiation and taking into account the physician's opinion influences adherence                                                    | D        | D       | —       |
| The team should strive for sincerity and openness from patients and families in order to receive quality information to improve adherence | H        | —       | 12      |
| <b>Focus on patient's expectations</b>                                                                                                    |          |         |         |
| The patient's expectations play an important role in the management of adherence                                                          | H        | —       | 13      |
| Patients have a higher probability of adherence when they feel emotionally supported by the physician and by the healthcare provider team | H        | —       | 7       |
| Patients have a higher probability of adherence when they feel emotionally supported by the physician                                     | H        | —       | 20      |
| <b>Quality of communication</b>                                                                                                           |          |         |         |
| A communication-oriented approach to problem solving improves adherence                                                                   | H        | —       | 8       |

| Statement                                                                                                                                                            | Outcomes |         |         |
|----------------------------------------------------------------------------------------------------------------------------------------------------------------------|----------|---------|---------|
|                                                                                                                                                                      | Round 1  | Round 2 | Ranking |
| The quality of communication between the team, the patient, and the family improves adherence because it makes the patient (and the caregiver) feel part of the team | H        | —       | 5       |
| The treating team should adopt a structured method of communication (questions, listening, paraphrasing, etc.)                                                       | H        | —       | 18      |
| Quality of communication means trying to speak the same language                                                                                                     | D        | H       | 17      |
| Quality of communication means listening and understanding the expectations and beliefs of the patient                                                               | H        | —       | 2       |
| Quality of communication means helping to make informed choices                                                                                                      | H        | —       | 11      |
| Quality of communication means being able to distinguish the excuses from the reasons                                                                                | D        | D       | —       |
| Quality of communication means being able to find the motivation and the patient involvement                                                                         | H        | —       | 4       |
| Quality of communication means to understand without criticizing (make judgments)                                                                                    | H        | —       | 15      |
| Quality of communication means correcting inappropriate behavior                                                                                                     | D        | D       | —       |
| Quality of communication means reinforcing and rewarding good behavior                                                                                               | D        | D       | —       |
| Quality of communication means negotiating gradual and achievable goals (step by step)                                                                               | H        | —       | 10      |
| Quality of communication means being able to measure and reward progress                                                                                             | H        | —       | 16      |
| Quality of communication means being able to use the progress to consolidate the adherence                                                                           | H        | —       | 9       |

Abbreviations: D = Disagreement; H = High level of agreement; NC= No consensus.

Rankings were assigned only to statements with a high level of agreement after Round 2 was completed.

**Supplemental Table 4** Differences in opinion between HCPs for statements in the *General Aspects* area

| Statement                                                                                                                                                                                                   | Total Panel*<br>(n 85) | Physicians<br>(n 36) | Physio-therapists<br>(n 19) | Psych-ologists<br>(n 14) | Nurses<br>(n 13) |
|-------------------------------------------------------------------------------------------------------------------------------------------------------------------------------------------------------------|------------------------|----------------------|-----------------------------|--------------------------|------------------|
| <b>General consideration</b>                                                                                                                                                                                |                        |                      |                             |                          |                  |
| The morbidity of patients with cystic fibrosis is influenced by the level of adherence to the therapeutic prescriptions received                                                                            | No                     | Yes                  | No                          | No                       | No               |
| <b>Definition</b>                                                                                                                                                                                           |                        |                      |                             |                          |                  |
| Adherence is an individual behavior comprising the degree of concordance with the medical advice received and the persistence of the behavior itself (ie, continued treatment for the recommended duration) | Yes                    | Yes                  | No                          | Yes                      | Yes              |
| Adherence means agreeing to one's own treatment plan and committing to follow it                                                                                                                            | Yes                    | Yes                  | No                          | Yes                      | No               |
| <b>Influencing factors</b>                                                                                                                                                                                  |                        |                      |                             |                          |                  |
| Adherence is influenced by the difficulty in combining the patient's lifestyle and obligations imposed by therapies                                                                                         | Yes                    | Yes                  | Yes                         | Yes                      | No               |
| Adherence is influenced by the high burden of treatment                                                                                                                                                     | Yes                    | Yes                  | Yes                         | No                       | No               |
| Adherence is influenced by the physician's ability to communicate                                                                                                                                           | Yes                    | Yes                  | Yes                         | Yes                      | No               |
| Adherence is influenced by the treating team's communication skills                                                                                                                                         | Yes                    | Yes                  | Yes                         | Yes                      | No               |
| <b>Psychological characteristics</b>                                                                                                                                                                        |                        |                      |                             |                          |                  |
| Adherence is conditioned by psycho-emotional conditions                                                                                                                                                     | Yes                    | Yes                  | Yes                         | Yes                      | No               |

\*Total panel for the first round also included one dietician, one biologist and one social worker.

**Supplemental Table 5** Differences in opinion between HCPs for statements in the *Roles and Relational Aspects* area

| Statement                                                                                                      | Total Panel*<br>(n 85) | Physicians<br>(n 36) | Physio-therapists<br>(n 19) | Psych-ologists<br>(n 14) | Nurses<br>(n 13) |
|----------------------------------------------------------------------------------------------------------------|------------------------|----------------------|-----------------------------|--------------------------|------------------|
| <b>Role of the healthcare team</b>                                                                             |                        |                      |                             |                          |                  |
| Adherence is influenced by the accuracy of information received by the patient from the physician              | Yes                    | No                   | Yes                         | Yes                      | Yes              |
| Adherence is influenced by the accuracy of information received by the patient from the care team              | Yes                    | No                   | Yes                         | Yes                      | Yes              |
| Adherence is influenced by the consistency of interventions dedicated to its support                           | Yes                    | No                   | Yes                         | Yes                      | No               |
| To influence adherence, it is necessary to understand the reasons behind the obstacles experienced by patients | Yes                    | Yes                  | Yes                         | Yes                      | No               |
| <b>Team/patient relationship</b>                                                                               |                        |                      |                             |                          |                  |
| To improve adherence, a structured motivational approach is useful                                             | Yes                    | Yes                  | No                          | No                       | Yes              |
| Listening to the patient attitude (what does he do? why?) increases adherence                                  | Yes                    | Yes                  | No                          | Yes                      | No               |
| The patient should be put in a situation where he can guide his own change                                     | Yes                    | No                   | Yes                         | Yes                      | Yes              |

\*Total panel for the first round also included one dietician, one biologist and one social worker.



**Supplemental Table 6** Differences in opinion between HCPs for statements in the *Management Aspects* area

| Statement                                                                                                                                 | Total Panel*<br>(n 85) | Physicians<br>(n 36) | Physio-<br>therapists<br>(n 19) | Psych-<br>ologists<br>(n 14) | Nurses<br>(n 13) |
|-------------------------------------------------------------------------------------------------------------------------------------------|------------------------|----------------------|---------------------------------|------------------------------|------------------|
| <b>Healthcare providers cultural approach</b>                                                                                             |                        |                      |                                 |                              |                  |
| Priority is to pay attention to the patient and his needs                                                                                 | Yes                    | No                   | Yes                             | Yes                          | Yes              |
| <b>Patient-centeredness</b>                                                                                                               |                        |                      |                                 |                              |                  |
| Making perceptible the fact that the healthcare provider understands how the patient is living with his condition influences adherence    | Yes                    | Yes                  | No                              | Yes                          | Yes              |
| <b>Focus on patient's expectations</b>                                                                                                    |                        |                      |                                 |                              |                  |
| Patients have a higher probability of adherence when they feel emotionally supported by the physician and by the healthcare provider team | Yes                    | Yes                  | No                              | Yes                          | Yes              |
| Patients have a higher probability of adherence when they feel emotionally supported by the physician                                     | Yes                    | Yes                  | No                              | Yes                          | Yes              |
| <b>Quality of communication</b>                                                                                                           |                        |                      |                                 |                              |                  |
| The treating team should adopt a structured method of communication (questions, listening, paraphrasing, etc.)                            | Yes                    | No                   | Yes                             | No                           | Yes              |
| Quality of communication means being able to find the motivation and the patient involvement                                              | Yes                    | Yes                  | Yes                             | Yes                          | No               |
| Quality of communication means to understand without criticizing (make judgments)                                                         | Yes                    | Yes                  | Yes                             | Yes                          | No               |
| Quality of communication means negotiating gradual and achievable goals (step by step)                                                    | Yes                    | Yes                  | Yes                             | No                           | Yes              |
| Quality of communication means being able to measure and reward progress                                                                  | Yes                    | Yes                  | No                              | No                           | Yes              |

\*Total panel for the first round also included one dietician, one biologist and one social worker.
